# Supplementary material for: Effect of persistence length on binding of DNA to polyions and overcharging of their intermolecular complexes in aqueous and in 1-methyl-3-octyl imidazolium chloride ionic liquid solutions
Source: Royal Society of Chemistry journal article supplement (doi:10.1039/c3cp51246k), 2013-01-01
Supplement: c3cp51246k.pdf [file c3cp51246k.pdf]

## Supporting Information

### Effect of Persistence Length on Binding of DNA to Polyions and Overcharging of their Intermolecular Complexes in Aqueous and in 1-Methyl-3-Octyl Imidazolium Chloride Ionic Liquid Solutions

Kamla Rawat<sup>1</sup>, Jyotsana Pathak<sup>1</sup> and H.B.Bohidar<sup>1,2\*</sup>

<sup>1</sup>Polymer and Biophysics Laboratory, School of Physical Sciences,

<sup>2</sup> Special Center for Nanosciences, Jawaharlal Nehru University, New Delhi 110067, India

\*Corresponding author email: [bohi0700@mail.jnu.ac.in](mailto:bohi0700@mail.jnu.ac.in)

Tel: +91 11 2670 4637, Fax: +91 11 2674 1837

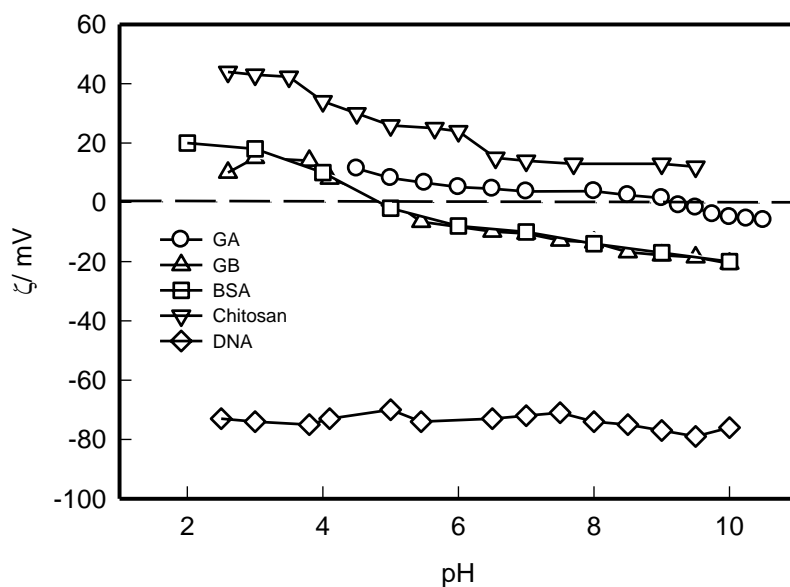

**Figure S1:** pH-dependent zeta potential data for DNA and all polyions used in the present study is shown pertaining to measurements performed at 20<sup>0</sup> C. Note the strong polyanionic nature of DNA, weak polycationic property of chitosan and polyampholytic behaviour of gelatin A and B, and BSA.

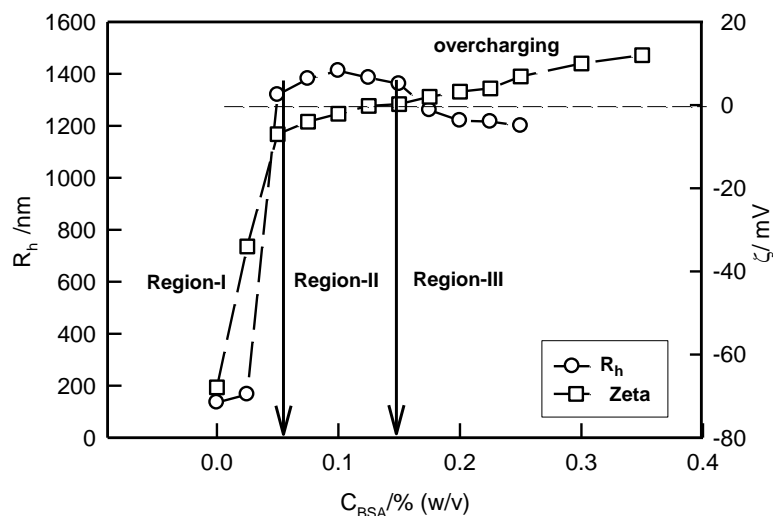

**Figure S2:** Plot of hydrodynamic size and zeta potential of DNA-BSA intermolecular complexes at pHc associative interactions ensue and soluble complexes are formed. Charge reversal and overcharging is clearly seen in Region-III. Here, DNA concentration was fixed at 0.05%. Solid lines are guide to the eye.

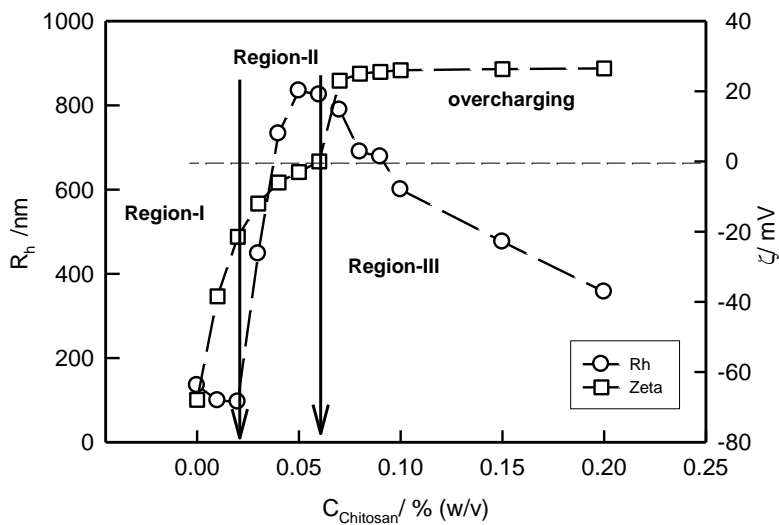

**Figure S3:** Plot of hydrodynamic size and zeta potential of DNA-chitosan intermolecular complexes at pHc where associative interactions ensue and soluble complexes are formed. Here, DNA concentration was fixed at 0.05%. Note the DNA chain softening due to binding with chitosan in Region-I. Charge reversal and overcharging is clearly seen in Region-III. Dotted line defines complete charge neutrality. Solid lines are guide to the eye.

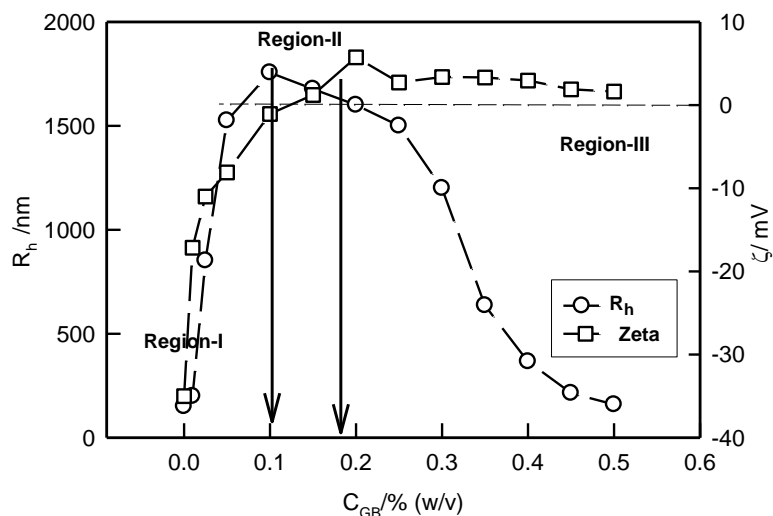

**Figure S4:** Variation in size of DNA-chitosan complex as function of polyion concentration in 0.05% [C8mim][Cl] solutions at  $pH_c$ . Here, DNA concentration was maintained at 0.05%. Note the overcharging of complexes for chitosan concentration exceeding 0.05%. Arrows indicate various binding regions. See text for details.

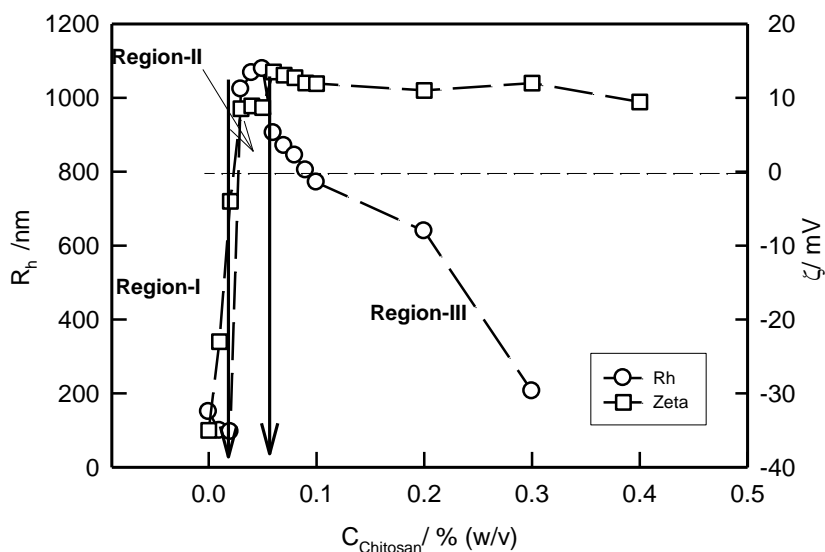

**Figure S5:** Variation in size of DNA-gelatin B complex as function of protein concentration in 0.05% [C8mim][Cl] solutions at  $pH_c$ . Here, DNA concentration was maintained at 0.05%. Note the overcharging of complexes for GB concentration exceeding 0.2%. Arrows indicate various binding regions. See text for details.
